# Supplementary material
Source: MDPI journal article supplement (https://www.mdpi.com/1424-2818/10/2/29)
Supplement: s1 [file s1]

## Sheet: Sheet1
Source	Region	Bat species	Max Col Size	Tree species	Diameter (cm)	Height	Live/Dead	M Rst Diam (cm)	% diff in diam	M Rst Ht (m)	% diff in ht	M No. Bats
Baker & Lacki 2006	NW	MYVO	.					60.9	1.13	26.7	1.82	.
Baker & Lacki 2006	NW	MYVO	459	Pinus ponderosa				82.3	1.52	31.5	2.14	.
Bergeson et al. 2015	MW	MYLU	.					56.9	.	10.7	.	121
Bergeson et al. 2015	MW	MYSO	.					53.6	.	15.5	.	38
Bernardos et al. 2004	SW	MYAUR	43	Quercus gambelii				46.4	1.06	10.7	1.3	.
Boland et al. 2009	WCAN	MYKE	.					106.5	2.1	.	.	.
Boland et al. 2009	WCAN	MYKE	.					65.6	1.31	.	.	.
Brandebura et al. 2011	SE	MYSO	10	Platanus occidentalis	63		Dead	.	.	.	.	.
Brigham et al. 1997	WCAN	MYCA	52					56	2	27	1.59	11.8
Britzke et al. 2003	SE	MYSO	81	Pinus rigida	55	23	Dead	49	2.27	18.3	.	27.4
Britzke et al. 2006	NE	MYSO	43					45.6	.	18.9	.	.
Broders & Forbes 2004	ECAN	MYSE	.					32	1.18	.	1	.
Broders & Forbes 2004	ECAN	MYSE	26					43.8	1.14	.	10.4	.
Broders & Forbes 2004	ECAN	MYLU	.					32.9	1.1	.	1	.
Callahan et al. 1997	MW	MYSO	.					49.3	1.23	.	.	4.5
Callahan et al. 1997	MW	MYSO	.					54.5	1.42	.	.	4.6
Callahan et al. 1997	MW	MYSO	.					54.6	1.18	.	.	36.5
Carter & Feldhamer 2005	MW	MYSO	.					39	1.03	17.5	1.11	.
Carter & Feldhamer 2005	MW	MYSE	.					37.3	1.07	15.8	1.06	.
Carver & Ashley 2008	SE	MYAU	.					76.4	0.75	25.2	0.91	.
Clement & Castleberry 2013	SE	MYAU	.					33.2	0.28	13.4	0.79	.
Cope et al. 1974	MW	MYSO	50	Ulmus americana	66		Dead	.	.	.	.	.
Crampton & Barclay 1996	WCAN	MYLU	60					41	.	22.3	.	15.3
Crampton & Barclay 1998	WCAN	MYLU	60					41	.	22.3	.	15.3
Cryan et al. 2001	MW	MYSE	41	Pinus ponderosa			Dead	39	1.23	9.1	0.8	4.4
Cryan et al. 2001	MW	MYTH	.					43.3	1.36	6.9	0.6	8.9
Cryan et al. 2001	MW	MYVO	31	Pinus ponderosa			Dead	42.6	1.34	11	0.96	3.6
Evelyn et al. 2004	NW	MYYU	.					115.2	3.74	19.6	2.02	.
Fleming et al. 2013	SE	MYAU	300					92	1.44	.	.	.
Fleming et al. 2013	SE	MYAU	.					74.9	1.14	.	.	.
Ford et al. 2006	NE	MYSE	.					16.6	0.52	10.3	0.48	.
Ford et al. 2006	NE	MYSE	.					53.4	2.06	31.5	1.59	.
Foster & Kurta 1999	MW	MYSE	60	Acer saccharinum				65	.	23.3	.	17
Garroway & Broders 2007	ECAN	MYSE	67					.	.	.	.	29
Garroway & Broders 2008	ECAN	MYSE	.					13.4	.	41	.	.
Garroway & Broders 2008	ECAN	MYSE	.					22.1	.	43	.	.
Gooding & Langford 2004	SE	MYAU	50	Nyssa aquatica	108	26.5		.	.	.	.	.
Grindal 1998	ECAN	MYSP	.					29.1	1.23	8.7	.	9.8
Hofmann et al. 1999	MW	MYAU	101	Nyssa aquatica	105		Live	.	.	.	.	.
Humphrey et al. 1977	MW	MYSO	51	Carya cordiformis			Dead	.	.	.	.	.
Johnson & Gates 2009	NE	MYSO	6	Ulmus americana				58.8	2.93	26.2	2.4	.
Johnson et al. 2010	NE	MYSO	.					41.4	1.56	21.6	1.67	.
Johnson et al. 2012	NE	MYSE	47					21	.	12.7	.	19.2
Johnson et al. 2012	NE	MYSE	48					34.8	.	13.2	.	17.6
Jung et al. 2004	CCAN	MYSE	.					42.6	1.52	20.1	1.3	.
Kalcounis & Hecker 1996	CCAN	MYLU	23	Populus tremuloides			Live	33.7	.	18.3	.	.
Kiser et al. 2002	MW	MYSO	384	Populus deltoides	54		Dead	.	.	.	.	.
Kurta et al. 1993a	MW	MYSO	45	Fraxinus pennsylvanica	31	15		36.5	.	23.3	.	.
Kurta et al. 1993b	MW	MYSO	95	Platanus occidentalis	56	16	Dead	.	.	.	.	.
Kurta et al. 1996	MW	MYSO	45					41	.	25.1	.	.
Kurta et al. 2002	MW	MYSO	54					42	.	18	.	.
Lacki & Baker 2007	NW	MYTH	118	Pinus ponderosa			Dead	82.6	1.56	31.3	2.17	.
Lacki & Schwierjohann 2001	SE	MYSE	65					30.3	2.05	6.82	.	25.6
Lacki & Schwierjohann 2001	SE	MYSE	.					20.9	2.09	3.7	.	13.5
Lacki & Schwierjohann 2001	SE	MYSE	.					12.7	1.6	4.28	.	3.8
Lacki et al. 2009	SE	MYSE	56	Liriodendron tulipifera	45	25	Dead	44.2	1.06	20.6	1.7	.
Lacki et al. 2009	SE	MYSE	.					34.6	1.08	19.7	1.11	.
Lacki et al. 2010	NW	MYVO	.					.	.	28.3	1.85	.
Menzel et al. 2002	NE	MYSE	65					29.2	0.84	18.7	1.11	31.3
Olson & Barclay 2013	WCAN	MYLU	386	Populus balsamifera			Dead	57.8	.	15.3	.	92
Olson & Barclay 2013	WCAN	MYLU	167	Populus sp.				37	.	20.3	.	16
Ormsbee 1996	NW	MYVO	300	Thuja plicata	45	29	Live	100.2	.	40	.	.
Ormsbee & McComb 1998	NW	MYVO	300	Thuja plicata			Dead	100	.	40	.	.
Parsons et al. 2003	WCAN	MYVO	.					45.5	1.16	.	.	.
Parsons et al. 2003	WCAN	MYLU	.					42.3	1.08	.	.	.
Perry & Thill 2007	SE	MYSE	51					15	.	7.9	.	.
Perry & Thill 2007	SE	MYSE	.					18.7	.	8.7	.	17.8
Psyllakis & Brigham 2006	WCAN	MYLU	388					48.2	1.3	24.6	1.22	1.29
Psyllakis & Brigham 2006	WCAN	MYLU	.					24	1.02	20.6	1.09	86.4
Rabe et al. 1998	SW	MYSP	984	Pseudotsuga menziesii				69.2	1.18	17.8	1.12	.
Rancourt et al. 2005	NW	MYEV	.					17.9	0.83	8.6	0.75	4
Sasse & Pekins 1996	NE	MYSE	36					40.9	1.24	14.8	1.68	10.8
Silvis et al. 2012	SE	MYSE	.					30.2	.	14.6	.	1.55
Silvis et al. 2014a	MW	MYSO	109					.	.	.	.	.
Silvis et al. 2014b	SE	MYSE	18					.	.	.	.	.
Silvis et al. 2015	SE	MYSE	25					32.4	.	15.8	.	.
Timpone et al. 2010	MW	MYSO	.					46	.	17.7	.	.
Timpone et al. 2010	MW	MYSE	.					43	.	15.7	.	.
Veilleux et al. 1998	MW	MYSO	16	Ulmus rubra	112		Dead	.	.	.	.	.
Vonhof & Gwilliam 2007	WCAN	MYCA	34					55.8	1.54	29.3	1.58	9
Waldien et al. 2000	NW	MYEV	.					93	.	34	.	.
Watrous et al. 2006	NE	MYSO	.					48	2.1	20.7	.	.
Weller & Zabel 2001	NW	MYTH	88				Dead	120.8	1.32	40.5	2.08	31
Whitaker and Brack 2002	MW	MYSO	139	Carya ovata	59		Dead	62	.	.	.	73.6
Whitaker & Sparks 2008	MW	MYSO	146	Carya ovata	59.3			65.8	.	20.7	.	.
Whitaker & Sparks 2008	MW	MYSO	.					37.8	.	21.7	.	.

## Sheet: Sheet2
Source
Baker & Lacki 2006
Bergeson et al. 2015
Bernardos et al. 2004
Boland et al. 2009
Brandebura et al. 2011
Brigham et al. 1997
Britzke et al. 2003
Britzke et al. 2006
Broders & Forbes 2004
Callahan et al. 1997
Carter & Feldhamer 2005
Carver & Ashley 2008
Clement & Castleberry 2013
Cope et al. 1974
Crampton & Barclay 1996
Crampton & Barclay 1998
Cryan et al. 2001
Evelyn et al. 2004
Fleming et al. 2013
Ford et al. 2006
Foster & Kurta 1999
Garroway & Broders 2007
Garroway & Broders 2008
Gooding & Langford 2004
Grindal 1998
Hofmann et al. 1999
Humphrey et al. 1977
Johnson & Gates 2009
Johnson et al. 2010
Johnson et al. 2012
Jung et al. 2004
Kalcounis & Hecker 1996
Kiser et al. 2002
Kurta et al. 1993a
Kurta et al. 1993b
Kurta et al. 1996
Kurta et al. 2002
Lacki & Baker 2007
Lacki & Schwierjohann 2001
Lacki et al. 2009
Lacki et al. 2010
Menzel et al. 2002
Olson & Barclay 2013
Ormsbee 1996
Ormsbee & McComb 1998
Parsons et al. 2003
Perry & Thill 2007
Psyllakis & Brigham 2006
Rabe et al. 1998
Rancourt et al. 2005
Sasse & Pekins 1996
Silvis et al. 2012
Silvis et al. 2014a
Silvis et al. 2014b
Silvis et al. 2015
Timpone et al. 2010
Veilleux et al. 1998
Vonhof & Gwilliam 2007
Waldien et al. 2000
Watrous et al. 2006
Weller & Zabel 2001
Whitaker and Brack 2002
Whitaker & Sparks 2008
